## **zDHHC5 expression is increased in cardiac hypertrophy and reduced in heart failure but this does not correlate with changes in substrate palmitoylation**

Alice Main<sup>1</sup>, Andri Bogusalvskiy<sup>2</sup>, Jacqueline Howie<sup>1</sup>, Chien-wen Kuo<sup>1</sup>, Aileen Rankin<sup>1</sup>, Francis L. Burton<sup>1</sup>, Godfrey L. Smith<sup>1</sup>, Roger Hajjar<sup>3</sup>, George S. Baillie<sup>1</sup>, Kenneth S. Campbell<sup>4</sup>, Michael J. Shattock<sup>2</sup>, William Fuller<sup>1\*</sup>

<sup>1</sup>Institute of Cardiovascular and Medical Sciences, University of Glasgow, Glasgow, G12 8QQ

<sup>2</sup>School of Cardiovascular and Metabolic Medicine and Sciences, King's College London, London, SE1 7EH

<sup>3</sup>Flagship Pioneering, Cambridge, MA 02142

<sup>4</sup>Division of Cardiovascular Medicine, University of Kentucky, Lexington, KY40506

\*: Correspondence: [will.fuller@glasgow.ac.uk](mailto:will.fuller@glasgow.ac.uk), @FullerLabGlas

### **Abstract:**

S-palmitoylation is an essential lipid modification catalysed by zDHHC-palmitoyl acyltransferases that regulates the localisation and activity of substrates in every class of protein and tissue investigated to date. In the heart, S-palmitoylation regulates sodium-calcium exchanger (NCX1) inactivation, phospholemman (PLM) inhibition of the Na<sup>+</sup>/K<sup>+</sup> ATPase, Nav1.5 influence on membrane excitability and membrane localisation of heterotrimeric G-proteins. The cell surface localised enzyme zDHHC5 palmitoylates NCX1 and PLM and is implicated in injury during anoxia/reperfusion. Information is lacking about how palmitoylation remodels in cardiac diseases. We investigated expression of zDHHC5 in animal models of left ventricular hypertrophy (LVH) and heart failure (HF), along with HF tissue from humans. zDHHC5 expression was rapidly elevated during onset of LVH, whilst HF was associated with decreased zDHHC5 expression. Paradoxically, palmitoylation of the zDHHC5 substrate NCX1 was significantly reduced in LVH but increased in human HF. Overexpression of zDHHC5 in rabbit ventricular cardiomyocytes was not sufficient to drive changes in palmitoylation of zDHHC5 substrates or overall cardiomyocyte contractility, suggesting changes in zDHHC5 expression in disease may not be a primary driver of pathology. zDHHC5 itself is regulated by post-translational modifications, including palmitoylation in its C-terminal tail, and we found the palmitoylation of zDHHC5 may be increased in heart failure in the same manner as NCX1, suggesting additional regulatory mechanisms such as acyl-CoA availability may be involved. Importantly, this study provides the first evidence that palmitoylation of cardiac substrates is altered in the setting of HF, and that expression of zDHHC5 is dysregulated in both hypertrophy and HF.

**Keywords:** palmitoylation, hypertrophy, heart failure, zDHHC5, cardiac

### **Declarations:**

**Funding:** We acknowledge financial support from the British Heart Foundation: 4-year PhD studentship to AM, SP/16/3/32317 and PG/18/60/33957 to WF, RG/17/15/33106 to MJS and WF, and NIH HL149164 and HL148785 to KSC and a Centre of Research Excellence award RE/18/6/34217.

**Acknowledgements:** We acknowledge the patients and families of organ donors who donated cardiac samples. Funding: American Heart Association TP135689, NIH1L48785, University of Kentucky Myocardial Recovery Alliance.

**Conflicts of interest/Competing interests:** None.

**Availability of data and material:** Further information and requests for resources and reagents should be directed to and will be fulfilled by the corresponding author, William Fuller: [will.fuller@glasgow.ac.uk](mailto:will.fuller@glasgow.ac.uk)

**Authors' contributions:**

AM: Conceptualization, Investigation, Formal Analysis, Writing – original draft

WF: Conceptualization, Project Administration, Funding Acquisition, Supervision, Writing – review and editing

AB, JH, CK, AR: Resources and methodology

RH, FB, GLS, GSB, KSC, MJS: Resources

## Introduction:

Heart failure (HF) represents a major economic and global burden affecting over 26 million people worldwide, with ~3.6 million patients newly diagnosed every year (Ambrosy *et al.*, 2014; Simmonds *et al.*, 2020). All clinical therapies currently aim to reduce myocardial demand by either reducing peripheral resistance and pre-load (i.e. angiotensin-converting enzyme inhibitors (ACEi)) or ventricular after-load and remodelling (i.e.  $\beta$ -blockers; Shah *et al.*, 2017). This largely helps to compensate for a reduction in ejection fraction and systolic dysfunction, as seen in HF with reduced ejection fraction (HFrEF) and therefore is more effective here than for HF with preserved ejection fraction (HFpEF). However, even though improved therapeutic recommendations for HFrEF significantly reduce morbidity and mortality rates in clinical trials, prognosis is still poor in this group with a trial of 40,000 hospitalised HF patients demonstrating a 5-year mortality rate of 75%, independent of LVEF (McMurray *et al.*, 2014; Shah *et al.*, 2017). As such, there remains a pressing and largely unmet clinical need for HF therapies.

Understanding the molecular basis of HF, in both humans and animal models, is essential to developing and directing appropriate therapies. However, this task is complicated by the fact that compensatory cardiac hypertrophy, leading to normal or even enhanced systolic function and left ventricular (LV) enlargement, often precedes decompensated HF and eventual LV dilatation and dysfunction (Kemp & Conte, 2012). The biochemical and molecular changes in both these phases of the disease are distinct, and currently available animal models are often better at modelling hypertrophy than the complex clinical syndrome of HF (Houser *et al.*, 2012). Interestingly, a key component of cardiac dysfunction associated with both cardiac hypertrophy and HF is the dysregulation in expression, modification and function of proteins involved in excitation contraction coupling (ECC). Many of the pathological changes in protein function in ECC during cardiac disease can be attributed to changes in post-translational modification regulation, including phosphorylation (Ramila *et al.*, 2015; Sequeira & Maack, 2018) and redox modifications like S-glutathionylation (Pastore & Piemonte, 2013). The majority of proteins involved in ECC have been reported to be regulated by the lipid post-translational modification of palmitoylation (see review by Essandoh *et al.*, 2020) with recent proteomic analysis suggesting over 450 cardiac proteins are palmitoylated (Miles *et al.*, 2021). Palmitoylation is a reversible modification involving the attachment of a fatty acid (most commonly palmitoyl derived from palmitoyl-CoA) to the thiol of a cysteine residue. This has a wide range of physiological effects, including regulating the location of the palmitoylated substrate, altering substrate activity by making an area more/less accessible, or regulating protein-protein interactions. The modification is catalysed by a group of chemically related zDHHC-palmitoyl acyltransferases (zDHHC-PATs) which are located throughout the secretory pathway (Main & Fuller, 2021).

Although important in regulating ECC substrate activity, the role of palmitoylation in cardiac disease and HF remains largely unknown. There have been limited studies conducted in zDHHC knock-out animals, but zDHHCs show redundancy and therefore determining individual enzyme characteristics via this route is challenging (Main & Fuller, 2021). The most well characterised cardiac DHHC is cell surface localised zDHHC5 (see review by Woodley and

Collins, 2021). NCX1 and Na<sup>+</sup>/K<sup>+</sup> ATPase both interact with zDHHC5 after its fourth transmembrane domain, in a site that also interacts with its accessory proteins Golga7 and Golga7b (Ko *et al.*, 2019; Plain *et al.*, 2020; Woodley & Collins, 2021). zDHHC5 directly palmitoylates ECC substrates NCX1 and PLM (Howie *et al.*, 2014; Gök *et al.*, 2020). ZDHHC5 has attracted attention in cardiac physiology as it is a key contributor to massive endocytosis (MEND) of the cellular membrane in anoxia/reperfusion (A/R) injury, with DHHC5 knock-out hearts showing enhanced functional recovery from MEND (Hilgemann *et al.*, 2013; Lin *et al.*, 2013). In the present study, we evaluated changes in zDHHC5 expression in animal models of left ventricular hypertrophy and heart failure, as well as in human ischaemic heart failure samples. For the first time, we provide the evidence that palmitoylation of cardiac substrates is altered in the setting of HF, and that expression of zDHHC5 is dysregulated in both hypertrophy and HF.

## Results:

### Remodelling of the cellular palmitoylation machinery in HF

There remains a pressing need to understand the gene and protein expression changes in the failing myocardium in HFpEF and HFrEF in order to tailor existing, and develop new, therapeutic options. Despite the knowledge that zDHHC5 is involved in A/R and regulates several important cardiac substrates, the expression or activity of zDHHC5, or any other palmitoylating or depalmitoylating enzymes, has not been investigated in a HF setting. Recently, Hahn and Knotsdottier *et al.* completed a comprehensive study of RNA transcript changes in HFpEF and HFrEF compared to organ donor controls. To investigate the relevance of palmitoylation as a modification in heart failure, using the available data, we plotted the change in relative abundance in HFpEF and HFrEF compared to organ donor controls of all available palmitoylating enzymes (zDHC-PATs), depalmitoylating enzymes (LYPLAs, PPTs and ABHDs), accessory proteins (Selenoprotein-K (Fredericks *et al.*, 2017) and Golga7 (Ko *et al.*, 2019)) and proteins involved in fatty acyl CoA production (acyl-CoA synthases (ACSL) and fatty acid synthase (FASN)). Several of these were found to be both up and down regulated in the failing myocardium with some changes unique to one phenotype, including zDHHC5 which was significantly reduced in HFpEF but not HFrEF. Fatty acid and fatty acyl CoA availability have recently emerged as regulators of protein palmitoylation (Main & Fuller, 2021). For example, acyl-CoA synthase (ACSL) isoforms physically associate with zDHHC5, and acyl-CoA synthase activity is required for insulin-induced palmitoylation of NCX1 (Gök *et al.*, 2022; Plain *et al.*, 2020). ACSLs 1 and 4 were significantly downregulated in both HFpEF and HFrEF, with significant changes in all other isoforms and fatty acid synthase in HFpEF only (Figure 1; Hahn *et al.*, 2021).

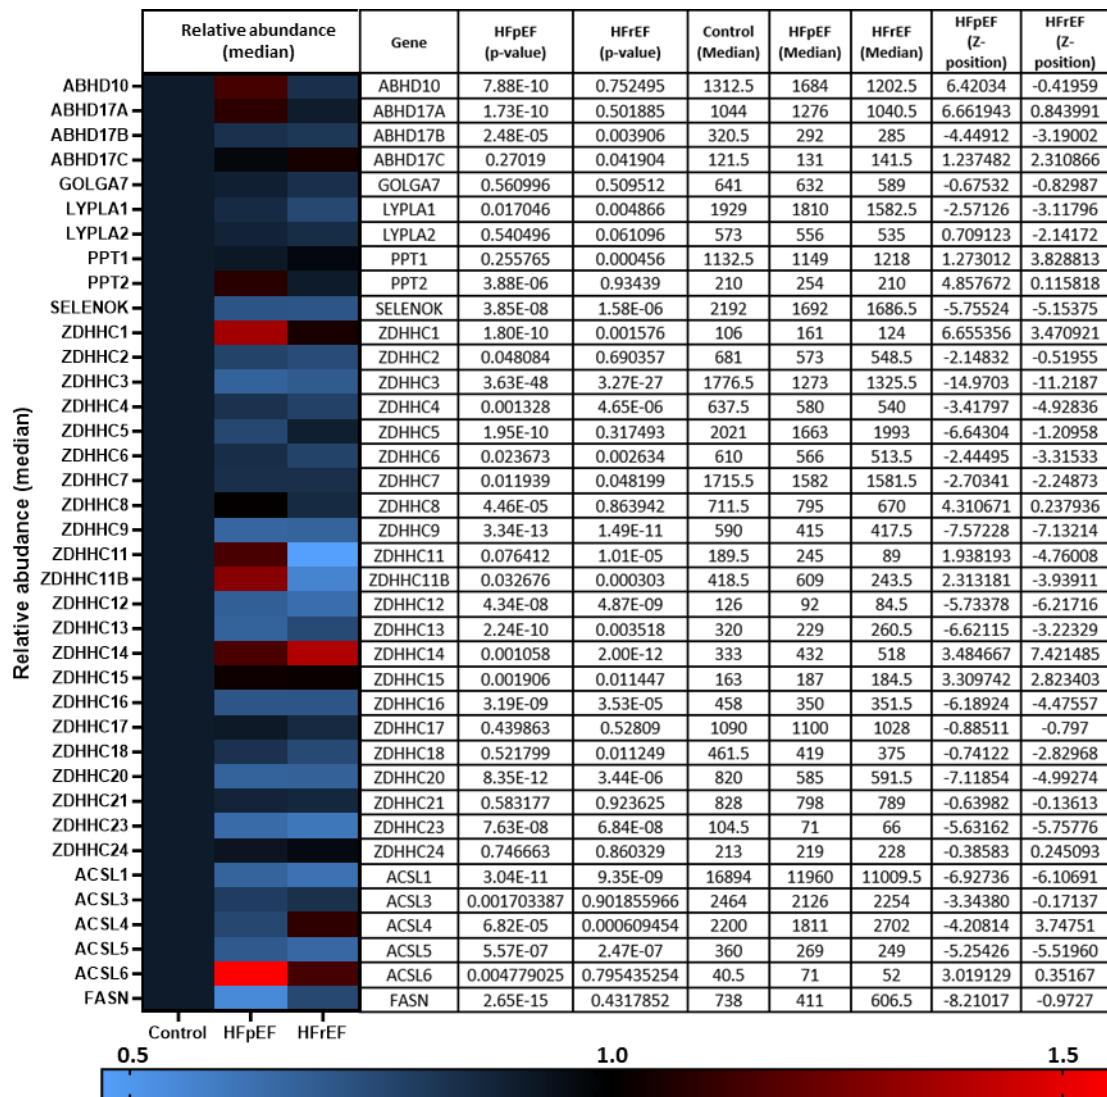

**Figure 1: RNA transcript changes of palmitoylating and depalmitoylating enzymes and accessory proteins in heart failure.** Hahn and Knutsdottir, *et al.* performed RNA sequencing on biopsies from heart failure patients with preserved ejection fraction (HFpEF, n=41), reduced ejection fraction (HFrEF, n=30) and donor controls (n=24). Abundance of transcripts of palmitoylating and depalmitoylating enzymes, including 23 zDHHC-palmitoyl acyltransferases, as well as accessory proteins and proteins involved in fatty acid synthesis, were investigated in the available data. HFpEF and HFrEF are plotted relative to control (normalised to 1) in the heat map with relative abundance and p-values detailed in the accompanying table (produced using the data repository from Hahn and Knutsdottir, *et al.* 2020).

### zDHHC5 in cardiac hypertrophy

Cardiac hypertrophy and associated remodelling of the left ventricle precedes many forms of cardiac disease, including heart failure, and is recognised as a crucial step in its pathophysiology (Rame & Dries, 2007). Left ventricular hypertrophy (LVH) induced by pressure overload via aortic constriction ('banding') is commonly used to investigate early molecular changes associated with pathological remodelling. This mouse model (detailed in Boguslavsky *et al.*, 2014) is associated with a 50% increase in LV mass 2 weeks after banding the thoracic aorta. We investigated changes in zDHHC5 expression associated with the onset of LVH. Compared to sham operated control mice, zDHHC5 expression was modestly

increased from the earliest timepoint investigated (3 days post-banding) and was significantly elevated 2-weeks and 8-weeks after surgery (Figure 2).

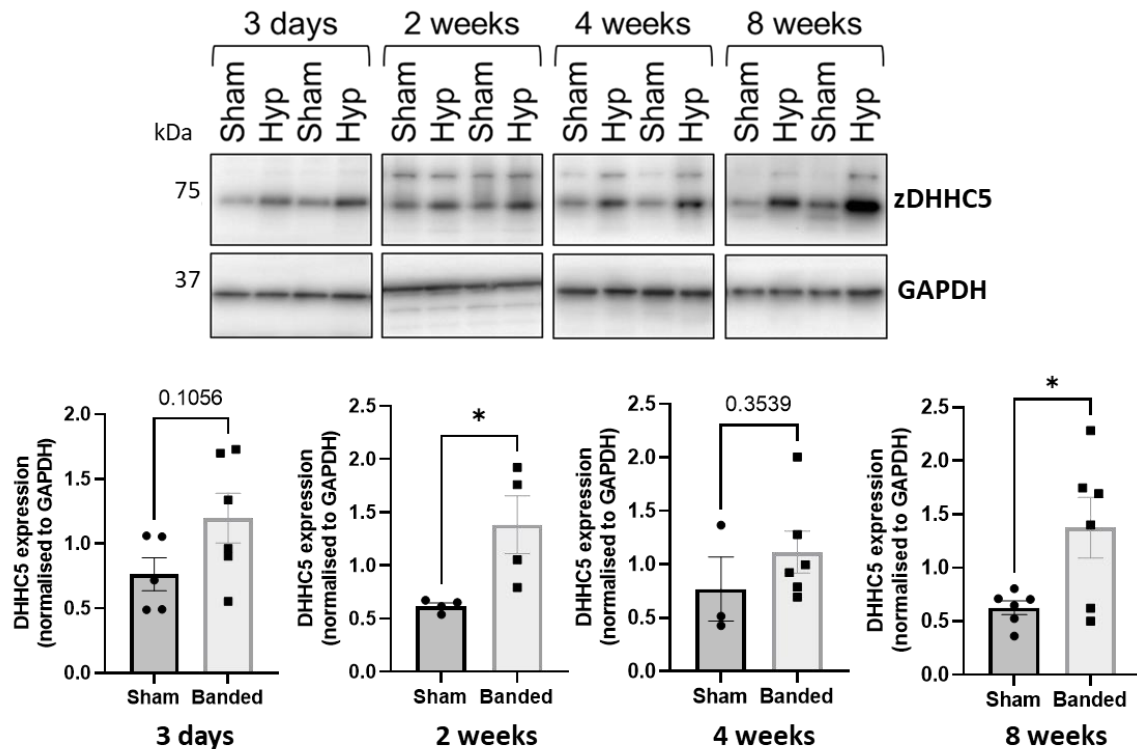

**Figure 2: Expression of zDHC5 is increased in mice with left ventricular hypertrophy from 3-days post-onset.** Ventricular samples from mice that underwent left ventricular hypertrophy induced by pressure overload and sham controls were taken at 3 days (n=4), 2 weeks (n=5-6), 4 week (n=3-6) and 8 week (n=6) post-onset. Expression of zDHC5 was significantly increased in hypertrophy samples compared to control at 3 days, 2 weeks and 8 weeks post-onset (\*p<0.05). zDHC5 expression is normalised to loading control GAPDH. Statistical comparisons made by unpaired Student's t-test. Data are mean±S.E.M.

As elevated zDHC5 expression was an early event in the onset of LVH, we investigated whether increased zDHC5 expression is directly associated with the contractile dysfunction observed in this phenotype. We engineered adenoviruses expressing HA-tagged zDHC5 and catalytically inactive zDHHS5, and infected adult rabbit ventricular cardiomyocytes, achieving dose dependent increases in zDHC5 expression levels (Figure 3A). Confocal microscopy revealed localisation of HA-tagged zDHC5 in intercalated discs, cell surface and perinuclear membrane (Supplementary Figure 1). Changes in contractile function were investigated using a CelLOPTIQ® contractility system (Clyde Biosciences Ltd.), and contractility parameters measured by determining the spatial frequency of the intensity profile of sarcomere bands over time (Supplementary Figure 2; Rocchetti *et al.*, 2014). Overexpression of zDHC5 or zDHHS5 had no effect on contractile force (as determined by sarcomere shortening (Figure 3B)) or on any other parameters of contractility (Supplementary Figure 3).

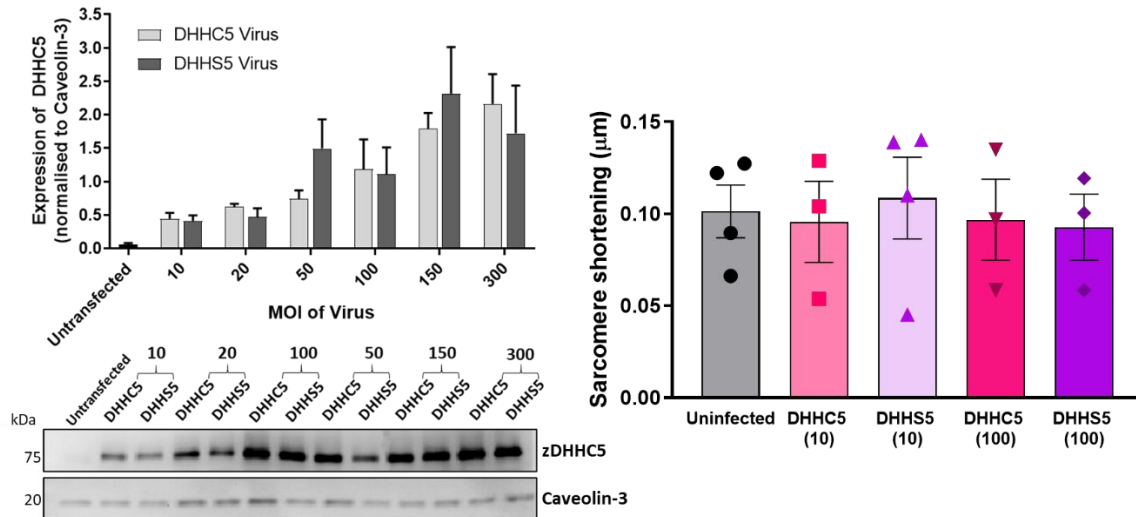

**Figure 3: DHH5 overexpression does not alter parameters of rabbit ventricular cardiomyocyte contractility.** **A)** Rabbit ventricular cardiomyocytes were cultured for 18-24 hours in the presence of either the HA-DHHC5 virus or a HA-DHHS5 dominant-negative virus, at an increasing range of virus particles per cell or multiplicity of infection (MOI; 10, 20, 50, 150, 300). DHHC5 protein expression was determined via western blot, normalising to housekeeper protein Caveolin-3. HA-DHHC5 and HA-DHHS5 viral infection led to a dose-dependent increase in DHHC5 expression. Data are expressed as mean $\pm$ S.E.M and is a representative image of n=3-4 biological replicates. **B)** Contractility recordings from cells infected with MOI of 10 and 100 were taken using CelLOPTIQ<sup>®</sup>. Viral infection with either DHHC5 or DHHS5 at MOI 10 or 100 had no significant effect on altering the parameters of contractility including sarcomere shortening. Data are mean $\pm$ S.E.M analysed using a one-way ANOVA with Sidak's post-hoc test. N=3 biological replicates for S10, C100, S100 and n=4 biological replicates for uninfected and C100, with n=20-51 cells per replicate.

As both LVH and viral infection were associated with increased zDHHC5 expression, we hypothesised palmitoylation of zDHHC5 substrates NCX1 and PLM would be increased in these samples. Despite overexpression of zDHHC5, development of LVH was associated with unchanged PLM palmitoylation, whilst NCX1 palmitoylation was significantly reduced (Figure 4A). In rabbit cardiomyocytes overexpressing HA-zDHHC5, there was no significant change in palmitoylation of NCX1 or PLM compared to uninfected control suggesting increasing zDHHC5 expression is not sufficient to drive changes in substrate palmitoylation (Figure 4B).



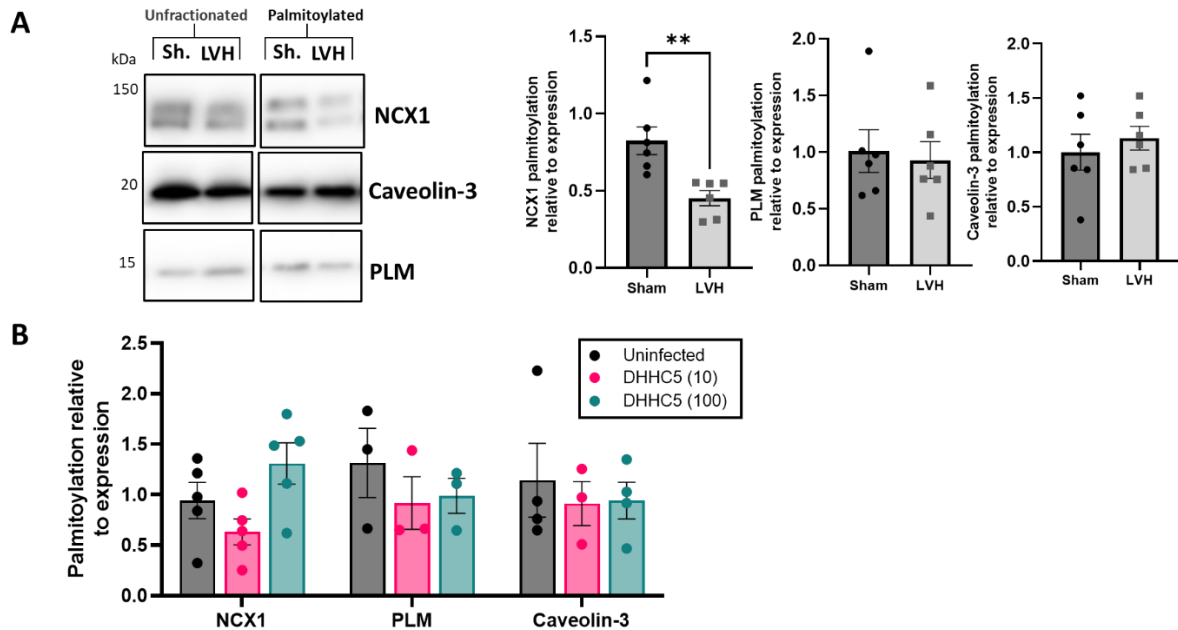

**Figure 4: zDHHHC5 overexpression in LVH or viral overexpression in rabbit cardiomyocytes does not correlate with an increase in palmitoylation of zDHHHC5 substrates. A)** Ventricular samples from mice that underwent left ventricular hypertrophy (LVH) induced by pressure overload and sham (Sh.) controls were taken at 8 weeks post-onset. Acyl-RAC revealed palmitoylation of zDHHHC5 substrate NCX1 was significantly reduced and palmitoylation of PLM remained unchanged. **B)** Rabbit ventricular cardiomyocytes overexpressing HA-zDHHHC5 (MOI 10 and 100) showed no significant change in NCX1 or PLM palmitoylation. Data are mean  $\pm$  S.E.M analysed via an unpaired t-test (LVH) or a one-way ANOVA with a Dunnett's post-hoc test (overexpression). \* $p < 0.05$ .

## zDHHHC5 in heart failure

As zDHHHC5 expression is increased in early cardiac hypertrophy, we investigated whether this difference persists in HF by analysing two experimental models (rabbit and pig) of myocardial infarction (MI) induced HF, as well as samples from ischaemic human HF patients (classified as reduced ejection fraction, details in Supplementary Table 1). In contrast to LVH, zDHHHC5 expression was unchanged or modestly reduced in post-MI samples compared to control. Additionally, despite RNA sequencing data suggesting zDHHHC5 expression levels are reduced in HFpEF but unchanged in HFrfEF (Figure 1; Hahn *et al.*, 2021) we found that protein expression of zDHHHC5 was also significantly reduced in ischaemic HF samples compared to organ donors (Figure 5). We also investigated the expression of thioesterase APT1, which depalmitoylates NCX1, but found there was no significant change in expression in these samples (Supplementary Figure 4; Gök *et al.*, 2021).

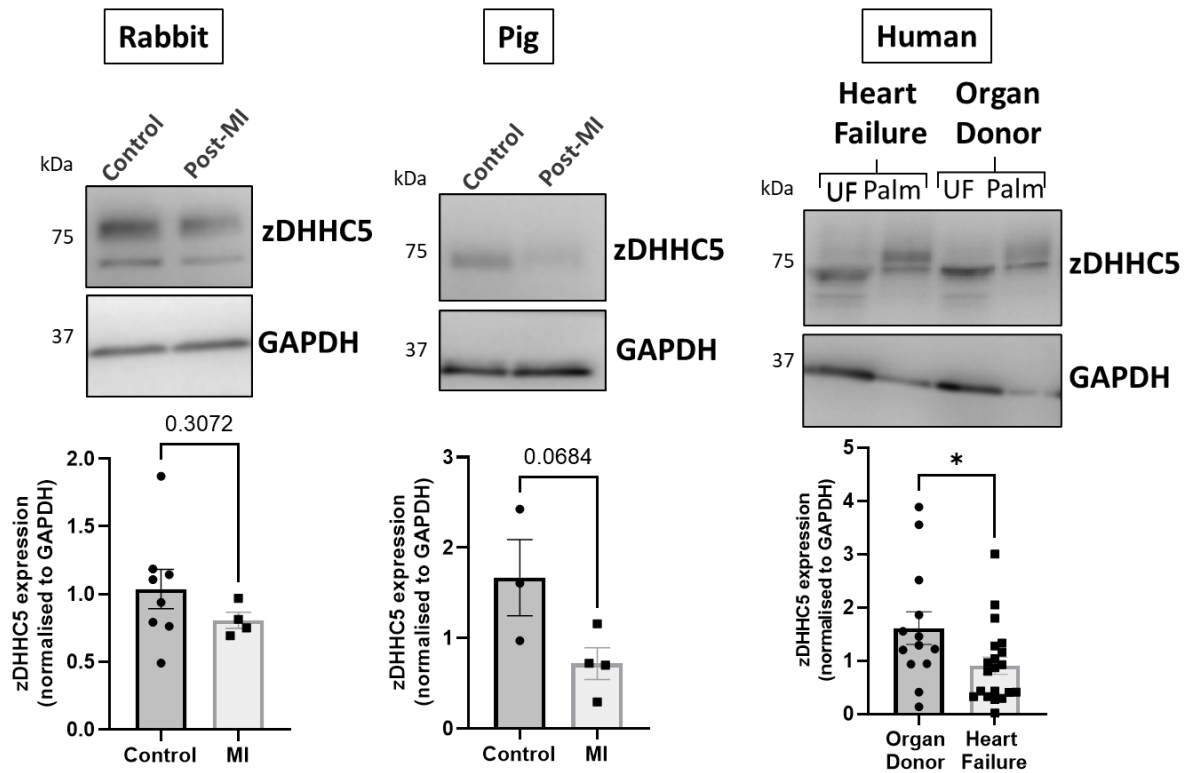

**Figure 5: zDHHc5 expression in heart failure.** In the rabbit model of MI-induced HF (8-weeks post-MI), zDHHc5 expression was unchanged whilst in the pig model of MI-induced HF with reperfusion (3-months post-MI) zDHHc5 expression was modestly reduced ( $p=0.0684$ ). In samples from patients with ischaemic heart failure, zDHHc5 expression was significantly reduced compared to organ donor controls. zDHHc5 expression was normalised to loading control GAPDH. Statistical comparisons made by unpaired Student's t-test. Data are mean  $\pm$  S.E.M. \* $p<0.05$ .

Given both animal models and human HF samples were associated with reduced zDHHc5 expression, we investigated whether this correlated with a change in the palmitoylation of zDHHc5 substrates NCX1 and PLM. Whilst PLM palmitoylation remained unchanged in all cases, NCX1 palmitoylation was significantly reduced in animal models of HF but increased in human heart failure (Figure 6).

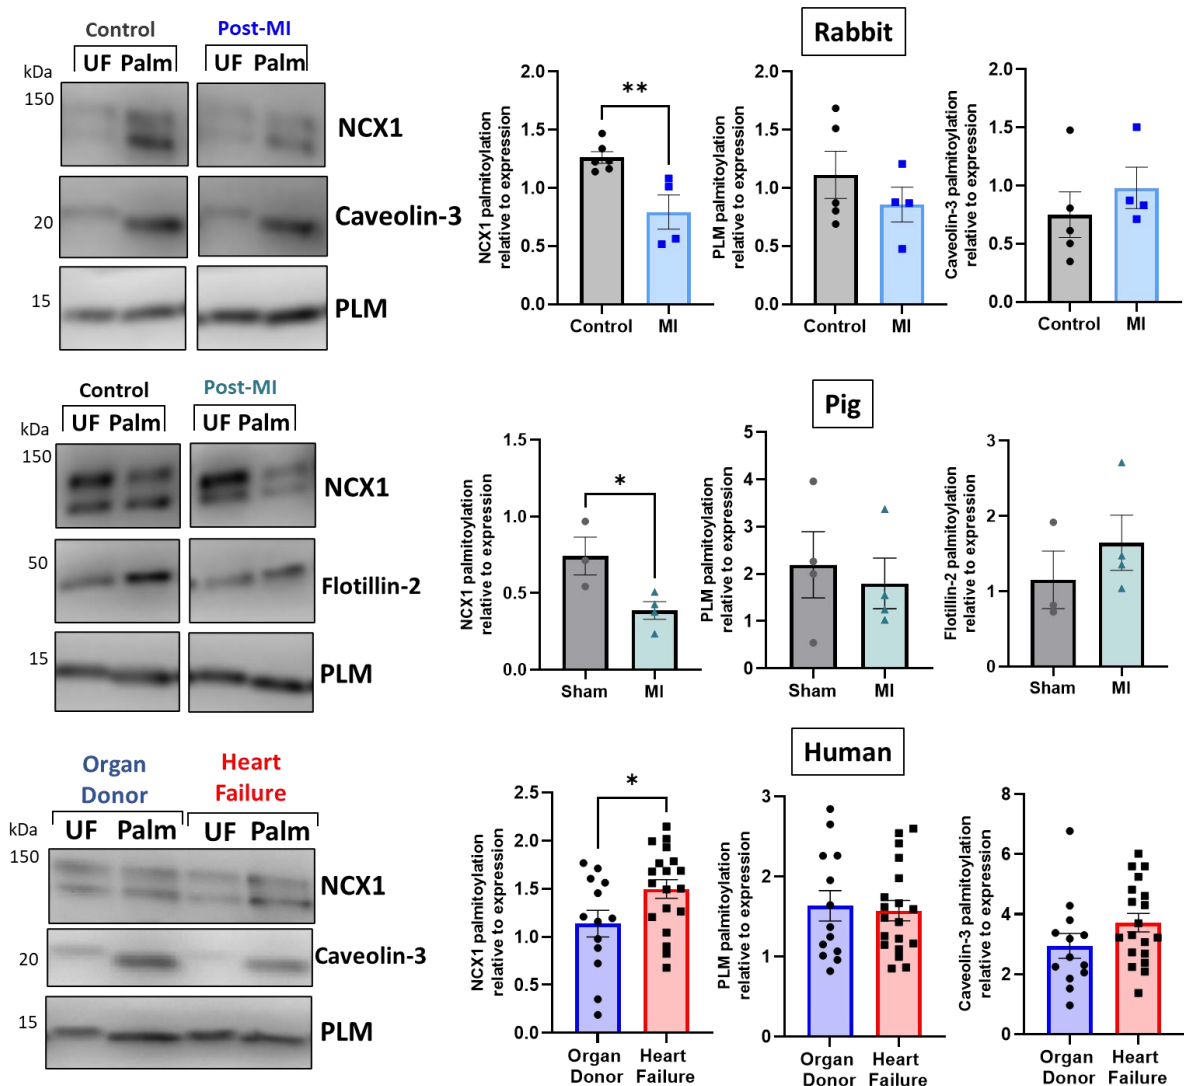

**Figure 6: Palmitoylation of zDHC5 substrates NCX1 and PLM in heart failure.** Palmitoylation of NCX1 and PLM was investigated in tissue from a rabbit model (8-weeks post-MI) and a pig model (3-months post-MI) of experimental HF, as well as samples from human organ donor and ischaemic heart failure patients. Palmitoylation of NCX1 was significantly reduced in animal models of HF but increased human heart failure samples, whilst palmitoylation of PLM and assay control Caveolin-3/Flotillin-2 remained unchanged. Data are palmitoylated fraction normalised to total protein (unfractionated, UF). Statistical comparisons made by unpaired Student's t-test. Data are mean  $\pm$  S.E.M. \* $p < 0.05$ , \*\* $p < 0.01$ .

In the present study, zDHC5 expression levels appear to correlate poorly with palmitoylation of its substrates, suggesting changes in zDHC5 expression may not be sufficient to increase palmitoylation of its substrates. ZDHC5 is the target of PTMs itself, including palmitoylation, which occurs on its active site cysteine during autopalmitylation before transferring the palmitate to a substrate cysteine (Brigidi *et al.*, 2015). Additionally, zDHC5 is palmitoylated at additional sites in its C-terminal tail, which is key to mediating its response to  $\beta$ -adrenergic signalling and facilitating its interaction with the  $\text{Na}^+/\text{K}^+$  ATPase, which regulates recruitment and palmitoylation of PLM (Chen *et al.*, 2020; Plain *et al.*, 2020; Yang *et al.*, 2010). As such, we investigated whether palmitoylation of zDHC5 was changed in HF. Interestingly, zDHC5 palmitoylation was altered in HF in a similar manner to that of NCX1, whereby zDHC5

palmitoylation was significantly reduced in the pig model (Figure 7A), but modestly increased in human HF samples, although this change is not significant (Figure 7B).

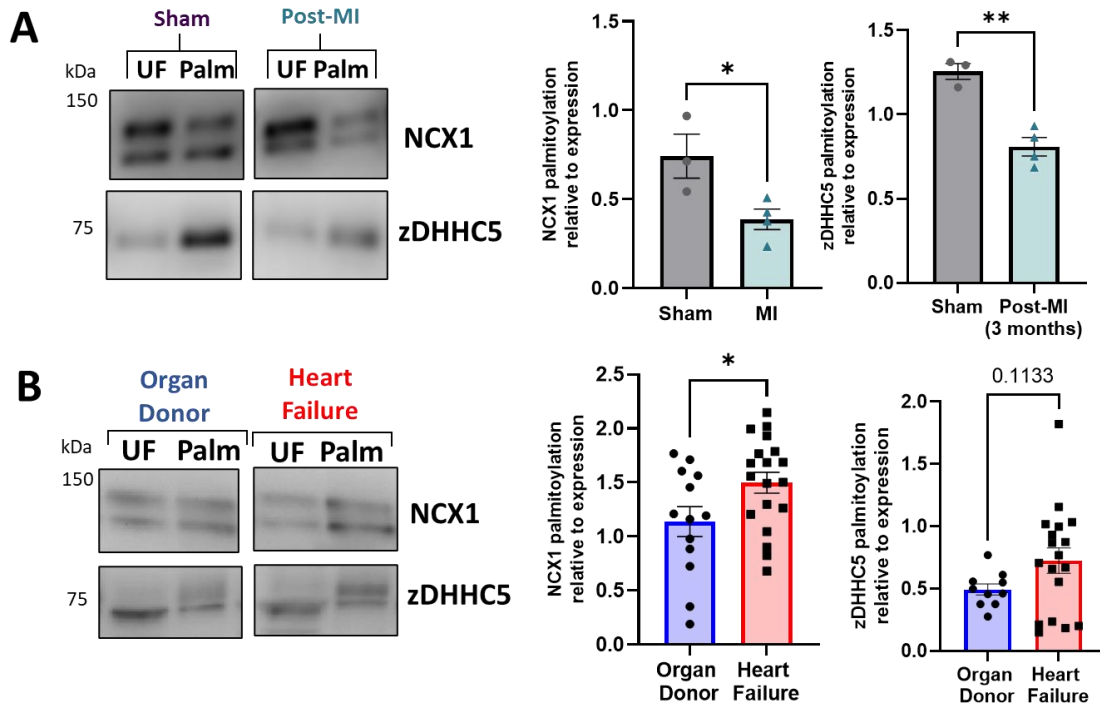

**Figure 7: zDHHc5 palmitoylation is altered in heart failure in a similar manner to NCX1 palmitoylation. A)** In a pig model of MI-induced heart failure, zDHHc5 palmitoylation is significantly reduced, whilst **B)** in human heart failure samples, zDHHc5 palmitoylation is modestly increased (p=0.1133). NCX1 data taken from Figure 6 for comparison. Statistical comparisons made by unpaired Student's t-test. Data are mean  $\pm$  S.E.M. \*p<0.05, \*\*p<0.01.

## Discussion:

Palmitoylation has emerged over the last decade a crucial regulatory modification for every class of protein, including several involved in cardiac excitation-contraction coupling (Chien *et al.*, 1996; Tulloch *et al.*, 2011; Howie *et al.*, 2013; Gök., 2020; Main *et al.*, 2022). As many of these proteins are dysregulated in diseases such as HF, palmitoylation may represent a novel mechanism to manipulate their function for therapeutic benefit (Main & Fuller, 2021). Despite this, studies investigating changes in palmitoylation in a cardiac disease setting have been limited. As such, we focussed our investigation on the most well classified cardiac zDHHC-PAT, zDHHC5, which has been implicated in A/R injury and regulates the palmitoylation of important ion transporters and accessory proteins in the heart (Tulloch *et al.*, 2011; Hilgemann *et al.*, 2013; Lin *et al.*, 2013; Howie *et al.*, 2014; Chen *et al.*, 2020; Gök *et al.*, 2020; Plain *et al.*, 2020). In the present study, we provide the first evidence that zDHHC5 expression and palmitoylation are altered in cardiac disease, although this does not directly correlate with a change in the palmitoylation of its substrates NCX1 and PLM.

Firstly, we observed that in a LVH model of cardiac hypertrophy and remodelling, zDHHC5 expression was upregulated as early as 3 days post-onset, and this was maintained until 8 weeks post-injury (Figure 2). Because there was such an acute upregulation of zDHHC5, we virally over-expressed zDHHC5 in cardiomyocytes to determine if there was a functional consequence for ventricular contractility, but this had no effect on any contractile parameters investigated (Figure 3). In both LVH samples and virally infected cardiomyocytes, despite increased zDHHC5 expression, there was no correlated increase in substrate palmitoylation, as palmitoylation of PLM remained unchanged, whilst NCX1 palmitoylation was significantly reduced in LVH samples (Figure 4). This suggests that zDHHC5 expression levels are not rate limiting for substrate palmitoylation in ventricular muscle. In other settings, availability of palmitoyl-CoA (Lin *et al.*, 2013) and activity of acyl-CoA synthase enzymes (Gök *et al.*, 2022), which may associate with zDHHC-PATs (Plain *et al.*, 2020), have been established to be important determinants of substrate palmitoylation.

We investigated whether the changes in zDHHC5 expression were observed later in disease pathogenesis using models of ischaemic HF, including a rabbit MI model and an ischaemia/reperfusion pig model, as well as samples from ischaemic HF patients. In contrast to cardiac hypertrophy, zDHHC5 expression was either unchanged (rabbit), modestly reduced (pig) or significantly reduced (human) in a HF setting (Figure 5). However, similarly to the LVH model, this was poorly correlated with changes in substrate palmitoylation, whereby palmitoylation of NCX1 was significantly reduced in the animal models of HF, but was significantly increased in human HF samples (Figure 6). Throughout our investigation we observed changes in zDHHC5 expression that did not consistently match changes in palmitoylation its substrate NCX1. ZDHHC5 itself is under the control of several regulatory pathways, including palmitoylation of cysteines in its C-terminal tail which has important functional consequences for substrate recruitment and palmitoylation (Chen *et al.*, 2020; Plain *et al.*, 2020). In addition, its activity may be controlled by the availability of its acyl-CoA substrate, synthesised by ACSLs. Analysis of zDHHC5 palmitoylation revealed that, similar to NCX1, palmitoylation was significantly reduced in the pig model and modestly increased

(although not significantly) in the human heart samples (Figure 7). This may suggest there are upstream regulatory pathways driving changes in substrate palmitoylation, including that of zDHHC5. ZDHHC-PATs have been frequently reported to palmitoylate each other, and a proximity biotinylation screen identified DHHC20 as an interactor and palmitoylating enzyme of zDHHC5. Palmitoylation of zDHHC5 C-terminal tail in response to adrenergic stimulation is required for its own stabilisation at the plasma membrane (Chen *et al.*, 2020; Woodley & Collins, 2021). The zDHHC5 palmitoylation site lies in an amphipathic helix containing a binding site for the Na<sup>+</sup>/K<sup>+</sup> ATPase and zDHHC5 accessory protein GOLGA7, which controls its membrane localisation (Plain *et al.*, 2020; Woodley and Collins, 2019). Increased zDHHC5 palmitoylation as observed in human HF, or reduced palmitoylation as observed in the pig model, may suggest increased or decreased activity of zDHHC5 either through a change in palmitate loading into the active site or a change in zDHHC20-mediated palmitoylation. This is not uncommon, as although NCX1 expression is often increased in the setting of LV dysfunction in HF, this does not necessarily correlate with increased activity (Hobai & O'Rourke, 2000; Quinn *et al.*, 2003).

Additionally, other PTMs of zDHHC5 will be important to consider in future investigations, as phosphorylation has been observed to inactivate zDHHC5 (Hao *et al.*, 2020; Schianchi *et al.*, 2020), while O-GlycNAcylation of DHHC5 enhanced PLM association and palmitoylation (Plain *et al.*, 2020; Schianchi *et al.*, 2020). In line with hypertrophy data, but in contrast to the ischaemic human HF results, Miles *et al.* report significantly increased levels of DHHC5 in human HF. However, the samples investigated represent a mixture of ischaemic and non-ischaemic samples, limiting the comparison to the ischaemic samples used in this study (Miles *et al.*, 2021). Nevertheless, given RNA-sequencing suggests levels will be significantly reduced in HFpEF and not HFrEF, further characterisation of zDHHC5 expression should be carried out in additional cohorts of patients (Hahn *et al.*, 2021). Steady state protein palmitoylation is controlled by the balanced activities of palmitoylating and depalmitoylating enzymes. Several depalmitoylating enzymes show altered expression in both HFrEF and HFpEF, although perhaps to not the same extent as the dysregulated of zDHHC-PAT expression (Figure 1). In comparison to zDHHC-PATs, relatively little is known about the regulation of these enzymes, although APT1 was recently demonstrated to depalmitoylate NCX1 (Gök *et al.*, 2021). However, we did not find a significant change in APT1 protein abundance in the setting of HF, so this likely does not explain the changes in substrate palmitoylation observed (Supplementary Figure 4).

Aside from information of zDHHC5 expression and palmitoylation, this study provides the first evidence that NCX1 palmitoylation is changed in cardiac disease in animal models and humans. Increased NCX1 palmitoylation, as observed in human HF, would enhance inactivation and reduce Ca<sup>2+</sup> efflux which, whilst improving systolic function, this would contribute to diastolic impairment, of which NCX1 is a key mediator (Kass *et al.*, 2004). Interestingly, the pattern of NCX1 palmitoylation associated with HF that we report here was recapitulated for cardiac myosin binding protein-C, again suggesting that upstream factors such as a fatty acid and fatty acyl-CoA availability may be regulating the changes of substrate palmitoylation (Main *et al.*, 2022).

A significant finding, but also a limitation of this study, is the lack of consistency in the changes in protein palmitoylation between different animal models and human HF. This makes it challenging to draw definitive conclusions regarding the importance of palmitoylation in cardiac disease. The increased palmitoylation in the human setting may be a result of more developed decompensation compared to the animal models, or as a result of pharmacological intervention. It may also reflect a failure of the animal model to accurately reflect human pathology. Indeed, this is a major limitation of current animal models for HF research, because they rarely include study of novel therapeutic interventions in combination with current optimal clinical care, making translational potential challenging. Interestingly, whilst NCX1 palmitoylation was frequently altered, PLM palmitoylation did not change in any setting (Plain *et al.*, 2020). However, this observation may be as a result of solely characterising palmitoylation using Acyl-RAC. Whilst this method provides a robust mechanism to detect protein palmitoylation, changes in substrate palmitoylation in singly palmitoylated proteins are most likely to be observed using this capture method, as opposed to substrates with multiple palmitoylation sites, where the substrate will still be captured even if only one site remains palmitoylated. Indeed, this may be why NCX1, with one palmitoylation site, is frequently observed to be changed whilst PLM containing two palmitoylation sites did not vary in any disease state (Howie *et al.*, 2018; Reilly *et al.*, 2015; Tulloch *et al.*, 2011). Experimental approaches that measure palmitoylation site occupancy of multiply palmitoylated proteins may provide further insight into the contribution of aberrant protein palmitoylation to the pathogenesis of heart failure.

## Methods:

**Human organ donor and ischaemic heart failure samples:** Samples from organ donors (non-failing) and human heart failure patients were obtained from the Gill Cardiovascular Biorepository at the University of Kentucky, of which patients and families of organ donors provided written consent. All procedures were approved by the local IRB and details of the collection procedures have been published previously (Blair *et al.*, 2016). The study conformed with the principles in the Declaration of Helsinki. Samples in this study were taken from the ventricular endocardium of each heart with details in Supplementary Table 1.

**Mouse model of cardiac hypertrophy induced by pressure overload:** Mouse samples were kindly provided by Professor Michael Shattock. Ventricular hypertrophy was induced by pressure overload via aortic constriction in 6-week old C57BL/6J mice, as has been previously described (Boguslavskyi *et al.*, 2014).

**Porcine model of heart failure:** Porcine samples were kindly provided by Dr. Roger Hajjar (New York, USA). Pigs were subjected to left anterior descending artery balloon occlusion to induce a myocardial infarction, as has been described previously (Tilemann *et al.*, 2013).

**Ethical statement:** Animals were handled in accordance with the UK Animals (Scientific Procedures) Act of 1986. All procedures were approved by the UK Home Office (PP7088535) and Glasgow University Ethics Review Committee. The animal research reported here adheres to the ARRIVE and Guide for the Care and Use of Laboratory Animals guidelines.

**Rabbit model of MI and heart failure:** Adult male New Zealand White rabbits (12 weeks old, ~3-4 kg) were given premedication with 0.4 mL/kg intramuscular Hypnorm (fentanyl citrate, 0.315 mg/mL; fluanisone 10 mg/mL, Janssen Pharmaceuticals). Anaesthesia was induced with 0.25–0.5 mg/kg midazolam (Hypnovel, Roche) via a cannula in the marginal ear vein. Rabbits were intubated and ventilated using a Harvard small animal ventilator with a 1:1 mixture of nitrous oxide and oxygen containing 1% halothane at a tidal volume of 50 mL and a frequency of 40 min<sup>-1</sup>. Preoperative antibiotic prophylaxis was given with 1ml Amfipen (ampicillin 100 mg/mL, Mycofarm UK Ltd) intramuscularly. A left thoracotomy was performed through the 4<sup>th</sup> intercostal space. Quinidine hydrochloride (10 mg/kg; Sigma Pharmaceuticals), a class IA antiarrhythmic (potassium channel blocker) was administered intravenously prior to coronary artery ligation to reduce the incidence of ventricular fibrillation. The marginal branch of the left circumflex coronary artery, which supplies most of the LV free wall, was ligated halfway between the atrio-ventricular groove and the cardiac apex to produce an ischaemic area of 30–40% of the LV (Nisbet *et al.*, 2016). Animals were maintained for 8 weeks to induce ischaemic cardiomyopathy phenotype which was confirmed by echocardiography measurements.

**Rabbit cardiomyocyte isolation:** Adult rabbit ventricular myocytes (ARVM) were isolated from male New Zealand white rabbits as previously described. Isolation of adult rabbit ventricular cardiomyocytes (ARVM) was completed as described previously (Kettlewell *et al.*, 2013). Briefly, New Zealand White male rabbits (12 weeks old, ~3-4kg) were euthanised with a terminal dose of sodium pentobarbital (100mg/kg) with heparin (500IU), following which the heart was removed and retrogradely perfused on a Langendorff system. Enzymatic



digestion of the tissue using a protease and collagenase solution occurred for ~15 minutes before heart was removed from the system and cut into sections (left atria, right atria, right ventricle, left ventricle and septal regions) and each was finely dissected in Krafte-Brühe solution. The mixture was then triturated and agitated for 10 minutes before filtering and the cell suspension was centrifuged manually for a minute before the pellet was re-suspended in fresh KB. For experiments, cells were stepped up to physiological calcium in modified Krebs-Henseleit solution, initially containing 100 $\mu$ M of CaCl<sub>2</sub> and left to settle for before the process was repeated using 200 $\mu$ M, 500 $\mu$ M, 1mM and 1.8mM concentrations of CaCl<sub>2</sub>. Cells were then snap frozen and kept at -80°C or used for functional experiments.

**Viral infection:** Adenoviruses expressing zDHC5 and zDHS5 were produced in house using the AdEasy system (Agilent). Rabbit ARVM were infected for 18-24 hours by adding virus directly to the culture medium.

**Acyl-resin assisted capture:** Acyl-resin assisted capture was used to purify palmitoylated proteins in a sample and adapted from a method published previously(Forrester *et al.*, 2011). Cultured and pelleted cells were lysed in blocking buffer containing 1% methyl methanethiosulfonate (MMTS) to methylate free cysteines. Proteins were then precipitated using acetone and the resulting pellet subsequently washed using 70% acetone to remove excess MMTS. The pellets were then re-suspended in binding buffer before a portion of the sample was taken (unfractionated sample, total protein). To the remaining solution, 250mM NH<sub>2</sub>OH (hydroxylamine (HA), pH 7.5) was added to hydrolyse thioester bonds, with the same concentration of sodium chloride (NaCl, pH 7.5) added in its place for negative control samples. The proteins with free cysteines were the purified using thiopropyl sepharose beads. Palmitoylation of substrates was determined by relative quantity in HA samples compared to unfractionated.

**Immunoblotting:** Standard western blotting was carried out using 6-20% gradient gels. The primary antibodies used were as follows: DHC5 (1:1000, Sigma, HPA014670), NCX1 (1:1000, Swant, R3F1), PLM (FXD1, 1:1000, Abcam, ab76597), Flotillin-2 (1:1000, BD Biosciences, 610383), Caveolin-3 (1:4000, BD Biosciences, 610420), HA-tag (1:5000, Roche, 11867423001). The secondary antibodies used were as follows: Rabbit anti-mouse HRP (1:2000, Jackson ImmunoResearch 111-035-144), Goat anti-rabbit HRP (1:2000, Jackson ImmunoResearch 315-035-003), Goat anti-rat HRP (1:2000, Jackson ImmunoResearch, 313-035-003), Donkey anti-guinea pig (1:2000, Jackson ImmunoResearch, 106-035-003).

**Confocal microscopy:** Cardiomyocytes on 16mm glass coverslips were fixed with 4% paraformaldehyde (PFA) for 15 minutes at room temperature. Cells were permeabilised with 0.1% Triton-X100 in PBS for 10 minutes at room temperature before blocking with 3% BSA in PBS for at least 1 hour. Coverslips were incubated with HA-tag primary antibody (1:200, Roche, 11867423001) in 0.1% BSA in PBS for 1 hour before subsequent incubation with anti-rat Alexa Fluor 546 secondary antibody (1:400, Thermofisher, A-11081) for an additional hour. Coverslips were then mounted onto glass slides using Dako Fluorescence Mounting Medium with 1 $\mu$ l/ml 4',6-diamidino-2-phenylindole (DAPI). Cells were then visualised using a Zeiss LSM 510 META Confocal Microscope with a 40x objective.

**Contractility measurements:** CelloPTIQ® is an *in vitro* system designed by Clyde Biosciences which allows measurements of contractility, voltage and calcium to be carried out in individual adult cardiomyocytes (Clyde Biosciences Ltd; Glasgow, UK). Following culture and infection of cardiomyocytes for 18-24 hours, cells were transferred to a modified Krebs-Henseleit solution containing 1.8mM CaCl<sub>2</sub> and incubated at 37°C using a heated stage. Cells were paced using electrodes with 40V pulses of 0.2ms duration at a frequency of 2Hz. Five second recordings at 100fps were then taken of individual cells using a 60x objective. Contractility recordings were analysed using an ImageJ Macro prepared by Dr Francis Burton which analyses the changes in sarcomere length as a measurement of cardiomyocyte contractility by determining the spatial frequency of the intensity profile of sarcomere bands over time. Each recording produced roughly 10 contractile peaks which were averaged to give one trace per cell which was analysed for contractility parameters of amplitude, time to up and down 90% of peak, contractile duration at 50% and 90% of peak and overall time to peak (Rocchetti *et al.*, 2014).

**Statistics:** Statistical analysis was completed using GraphPad Prism (Version 7; California, USA) and was performed on groups with 3 biological replicates or more. For comparisons in data sets with more than two groups, a one-way analysis of variance (ANOVA) with a Sidak's or Dunnett's post-hoc test was used, with comparisons detailed in the figure legend. For comparisons of two groups, a paired or unpaired Student's t-test was used. All samples were tested for the presence of significant outliers (Rout's test). A probability of  $p < 0.05$  was considered to be statistically significant.

## References:

- Ambrosy, A. P., Fonarow, G. C., Butler, J., Chioncel, O., Greene, S. J., Vaduganathan, M., Nodari, S., Lam, C. S. P., Sato, N., Shah, A. N., & Gheorghiade, M. (2014). The Global Health and Economic Burden of Hospitalizations for Heart Failure: Lessons Learned From Hospitalized Heart Failure Registries. *Journal of the American College of Cardiology*, *63*(12), 1123–1133. <https://doi.org/10.1016/J.JACC.2013.11.053>
- Blair, C. A., Haynes, P., Campbell, S. G., Chung, C., Mitov, M. I., Dennis, D., Bonnell, M. R., Hoopes, C. W., Guglin, M., & Campbell, K. S. (2016). A Protocol for Collecting Human Cardiac Tissue for Research. *The VAD Journal : The Journal of Mechanical Assisted Circulation and Heart Failure*, *2*(1). <https://doi.org/10.13023/VAD.2016.12>
- Boguslavskiy, A., Pavlovic, D., Aughton, K., Clark, J. E., Howie, J., Fuller, W., & Shattock, M. J. (2014). Cardiac hypertrophy in mice expressing unphosphorylatable phospholemman. *Cardiovascular Research*, *104*(1), 72–82. <https://doi.org/10.1093/CVR/CVU182>
- Brigidi, G. S., Santyr, B., Shimell, J., Jovellar, B., & Bamji, S. X. (2015). Activity-regulated trafficking of the palmitoyl-acyl transferase DHHC5. *Nature Communications* *2015* *6*:1, *6*(1), 1–17. <https://doi.org/10.1038/ncomms9200>
- Chen, J. J., Marsden, A. N., Scott, C. A., Akimzhanov, A. M., & Boehning, D. (2020). DHHC5 Mediates  $\beta$ -Adrenergic Signaling in Cardiomyocytes by Targeting  $G\alpha$  Proteins. *Biophysical Journal*, *118*(4), 826. <https://doi.org/10.1016/J.BPJ.2019.08.018>
- Chien, A. J., Carr, K. M., Shirokov, R. E., Rios, E., & Marlene Hosey, M. (1996). Identification of Palmitoylation Sites within the L-type Calcium Channel  $\beta$ 2a Subunit and Effects on Channel Function \*. *Journal of Biological Chemistry*, *271*(43), 26465–26468. <https://doi.org/10.1074/JBC.271.43.26465>
- Essandoh, K., Philippe, J. M., Jenkins, P. M., & Brody, M. J. (2020). Palmitoylation: A Fatty Regulator of Myocardial Electrophysiology. In *Frontiers in Physiology* (Vol. 11). Frontiers Media S.A. <https://doi.org/10.3389/fphys.2020.00108>
- Forrester, M. T., Hess, D. T., Thompson, J. W., Hultman, R., Moseley, M. A., Stamler, J. S., & Casey, P. J. (2011). Site-specific analysis of protein S-acylation by resin-assisted capture. *Journal of Lipid Research*, *52*(2), 393–398. <https://doi.org/10.1194/jlr.D011106>
- Fredericks, G. J., Hoffmann, F. W., Hondal, R. J., Rozovsky, S., Urschitz, J., & Hoffmann, P. R. (2017). Selenoprotein K Increases Efficiency of DHHC6 Catalyzed Protein Palmitoylation by Stabilizing the Acyl-DHHC6 Intermediate. *Antioxidants* *2018*, *Vol. 7*, *Page 4*, *7*(1), 4. <https://doi.org/10.3390/ANTIOX7010004>
- Gök, C., Main, A., Gao, X., Kerekes, Z., Plain, F., Kuo, C.-W., Robertson, A. D., Fraser, N. J., & Fuller, W. (2021). Insights into the Molecular Basis of the Palmitoylation and Depalmitoylation of NCX1. *Cell Calcium*, 102408. <https://doi.org/10.1016/j.ceca.2021.102408>

- Gök, C., Plain, F., Robertson, A. D., Howie, J., Baillie, G. S., Fraser, N. J., & Fuller, W. (2020a). Dynamic Palmitoylation of the Sodium-Calcium Exchanger Modulates Its Structure, Affinity for Lipid-Ordered Domains, and Inhibition by XIP Palmitoylation modifies NCX1 XIP affinity and hence regulates intracellular Ca. *Dynamic Palmitoylation of the Sodium-C. CellReports*, *31*, 107697. <https://doi.org/10.1016/j.celrep.2020.107697>
- Gök, C., Plain, F., Robertson, A. D., Howie, J., Baillie, G. S., Fraser, N. J., & Fuller, W. (2020b). Dynamic Palmitoylation of the Sodium-Calcium Exchanger Modulates Its Structure, Affinity for Lipid-Ordered Domains, and Inhibition by XIP. *Cell Reports*, *31*(10). <https://doi.org/10.1016/j.celrep.2020.107697>
- Gök, C., Robertson, A. D., & Fuller, W. (2022). Insulin-induced palmitoylation regulates the Cardiac Na<sup>+</sup>/Ca<sup>2+</sup> exchanger NCX1. *Cell Calcium*, *104*, 102567. <https://doi.org/10.1016/J.CECA.2022.102567>
- Hahn, V. S., Knutsdottir, H., Luo, X., Bedi, K., Margulies, K. B., Haldar, S. M., Stolina, M., Yin, J., Khakoo, A. Y., Vaishnav, J., Bader, J. S., Kass, D. A., & Sharma, K. (2021). Myocardial Gene Expression Signatures in Human Heart Failure With Preserved Ejection Fraction. *Circulation*, *120*–134. <https://doi.org/10.1161/CIRCULATIONAHA.120.050498>
- Hao, J. W., Wang, J., Guo, H., Zhao, Y. Y., Sun, H. H., Li, Y. F., Lai, X. Y., Zhao, N., Wang, X., Xie, C., Hong, L., Huang, X., Wang, H. R., Li, C. bin, Liang, B., Chen, S., & Zhao, T. J. (2020). CD36 facilitates fatty acid uptake by dynamic palmitoylation-regulated endocytosis. *Nature Communications* *2020 11:1*, *11*(1), 1–16. <https://doi.org/10.1038/s41467-020-18565-8>
- Hilgmann, D. W., Fine, M., Linder, M. E., Jennings, B. C., Lin, M.-J. J., Hilgmann, D. W., Fine, M., Linder, M. E., Jennings, B. C., & Lin, M.-J. J. (2013). Massive endocytosis triggered by surface membrane palmitoylation under mitochondrial control in BHK fibroblasts. *ELife*, *2013*(2), e01293. <https://doi.org/10.7554/eLife.01293>
- Hobai, I. A., & O'Rourke, B. (2000). Enhanced Ca<sup>2+</sup>-Activated Na<sup>+</sup>-Ca<sup>2+</sup> Exchange Activity in Canine Pacing-Induced Heart Failure. *Circulation Research*, *87*(8), 690–698. <https://doi.org/10.1161/01.RES.87.8.690>
- Houser, S. R., Margulies, K. B., Murphy, A. M., Spinale, F. G., Francis, G. S., Prabhu, S. D., Rockman, H. A., Kass, D. A., Molkentin, J. D., Sussman, M. A., & Koch, W. J. (2012). Animal Models of Heart Failure. *Circulation Research*, *78*–94. <https://doi.org/10.1161/RES.0B013E3182582523>
- Howie, J., Reilly, L., Fraser, N. J., Walker, J. M. V., Wypijewski, K. J., Ashford, M. L. J., Calaghan, S. C., McClafferty, H., Tian, L., Shipston, M. J., Boguslavskyi, A., Shattock, M. J., & Fuller, W. (2014). Substrate recognition by the cell surface palmitoyl transferase DHHC5. *Proceedings of the National Academy of Sciences of the United States of America*, *111*(49), 17534–17539. <https://doi.org/10.1073/pnas.1413627111>

- Howie, J., Tulloch, L. B., Shattock, M. J., & Fuller, W. (2013). Regulation of the cardiac Na(+) pump by palmitoylation of its catalytic and regulatory subunits. *Biochemical Society Transactions*, 41(1), 95–100. <https://doi.org/10.1042/BST20120269>
- Howie, J., Wypijewski, K. J., Plain, F., Tulloch, L. B., Fraser, N. J., & Fuller, W. (2018). Greasing the wheels or a spanner in the works? Regulation of the cardiac sodium pump by palmitoylation. *Critical Reviews in Biochemistry and Molecular Biology*, 53(2), 175–191. <https://doi.org/10.1080/10409238.2018.1432560>
- Kass, D. A., Bronzwaer, J. G. F., & Paulus, W. J. (2004). What mechanisms underlie diastolic dysfunction in heart failure? *Circulation Research*, 94(12), 1533–1542. <https://doi.org/10.1161/01.RES.0000129254.25507.d6>
- Kemp, C. D., & Conte, J. v. (2012). The pathophysiology of heart failure. *Cardiovascular Pathology*, 21(5), 365–371. <https://doi.org/10.1016/J.CARPAT.2011.11.007>
- Kettlewell, S., Burton, F. L., Smith, G. L., & Workman, A. J. (2013). Chronic myocardial infarction promotes atrial action potential alternans, afterdepolarizations, and fibrillation. *Cardiovascular Research*, 99(1), 215–224. <https://doi.org/10.1093/cvr/cvt087>
- Ko, P. J., Woodrow, C., Dubreuil, M. M., Martin, B. R., Skouta, R., Bassik, M. C., & Dixon, S. J. (2019). A ZDHHC5-GOLGA7 Protein Acyltransferase Complex Promotes Nonapoptotic Cell Death. *Cell Chemical Biology*, 26(12), 1716-1724.e9. <https://doi.org/10.1016/J.CHEMBIOL.2019.09.014>
- Lin, M. J., Fine, M., Lu, J. Y., Hofmann, S. L., Frazier, G., & Hilgemann, D. W. (2013). Massive palmitoylation-dependent endocytosis during reoxygenation of anoxic cardiac muscle. *ELife*, 2013(2), 1295. <https://doi.org/10.7554/eLife.01295>
- Main, A., & Fuller, W. (2021). Protein S-Palmitoylation: advances and challenges in studying a therapeutically important lipid modification. *The FEBS Journal*. <https://doi.org/10.1111/FEBS.15781>
- Main, A., Milburn, G. N., Balesar, R. M. N., Rankin, A. C., Smith, G. L., Campbell, K. S., Baillie, G. S., Velden, J. van der, & Fuller, W. (2022). Cardiac myosin binding protein-C palmitoylation is associated with increased myofilament affinity, reduced myofilament Ca<sup>2+</sup> sensitivity and is increased in ischaemic heart failure. *BioRxiv*, 2022.06.21.496992. <https://doi.org/10.1101/2022.06.21.496992>
- McMurray, J., Packer, M., Desai, A., Gong, J., Lefkowitz, M., Rizkala, A., Rouleau, J., Shi, V., Solomon, S., Swedberg, K., & Zile, M. (2014). Angiotensin-neprilysin inhibition versus enalapril in heart failure. *The New England Journal of Medicine*, 371(11), 132–133. <https://doi.org/10.1056/NEJM0A1409077>
- Miles, M. R., Seo, J., Jiang, M., Wilson, Z. T., Little, J., Hao, J., Andrade, J., Ueberheide, B., & Tseng, G. N. (2021). Global identification of S-palmitoylated proteins and detection of palmitoylating (DHHC) enzymes in heart. *Journal of Molecular and Cellular Cardiology*, 155, 1–9. <https://doi.org/10.1016/J.YJMCC.2021.02.007>

- Nisbet, A. M., Camelliti, P., Walker, N. L., Burton, F. L., Cobbe, S. M., Kohl, P., & Smith, G. L. (2016). Prolongation of atrio-ventricular node conduction in a rabbit model of ischaemic cardiomyopathy: Role of fibrosis and connexin remodelling. *Journal of Molecular and Cellular Cardiology*, *94*, 54. <https://doi.org/10.1016/j.yjmcc.2016.03.011>
- Pastore, A., & Piemonte, F. (2013). Protein Glutathionylation in Cardiovascular Diseases. *International Journal of Molecular Sciences*, *14*(10), 20845. <https://doi.org/10.3390/IJMS141020845>
- Plain, F., Howie, J., Kennedy, J., Brown, E., Shattock, M. J., Fraser, N. J., & Fuller, W. (2020). Control of protein palmitoylation by regulating substrate recruitment to a zDHHC-protein acyltransferase. *Communications Biology*, *3*(1). <https://doi.org/10.1038/s42003-020-01145-3>
- Quinn, F. R., Currie, S., Duncan, A. M., Miller, S., Sayeed, R., Cobbe, S. M., & Smith, G. L. (2003). Myocardial Infarction Causes Increased Expression But Decreased Activity of the Myocardial Na<sup>+</sup>—Ca<sup>2+</sup> Exchanger in the Rabbit. *The Journal of Physiology*, *553*(1), 229–242. <https://doi.org/10.1113/JPHYSIOL.2003.050716>
- Rame, J. E., & Dries, D. L. (2007). Heart failure and cardiac hypertrophy. *Current Treatment Options in Cardiovascular Medicine*, *9*(4), 289–301. <https://doi.org/10.1007/S11936-007-0024-3>
- Ramila, K. C., Jong, C. J., Pastukh, V., Ito, T., Azuma, J., & Schaffer, S. W. (2015). Role of protein phosphorylation in excitation-contraction coupling in taurine deficient hearts. *American Journal of Physiology. Heart and Circulatory Physiology*, *308*(3), H232–H239. <https://doi.org/10.1152/AJPHEART.00497.2014>
- Reilly, L., Howie, J., Wypijewski, K., Ashford, M. L. J., Hilgemann, D. W., & Fuller, W. (2015). Palmitoylation of the Na/Ca exchanger cytoplasmic loop controls its inactivation and internalization during stress signaling. *FASEB Journal*, *29*(11), 4532–4543. <https://doi.org/10.1096/fj.15-276493>
- Rocchetti, M., Sala, L., Rizzetto, R., Irene Staszewsky, L., Alemanni, M., Zambelli, V., Russo, I., Barile, L., Cornaghi, L., Altomare, C., Ronchi, C., Mostacciolo, G., Lucchetti, J., Gobbi, M., Latini, R., & Zaza, A. (2014). Ranolazine prevents INaL enhancement and blunts myocardial remodelling in a model of pulmonary hypertension. *Cardiovascular Research*, *104*(1), 37–48. <https://doi.org/10.1093/CVR/CVU188>
- Schianchi, F., Glatz, J. F. C., Gascon, A. N., Nabben, M., Neumann, D., & Luiken, J. J. F. P. (2020). Putative Role of Protein Palmitoylation in Cardiac Lipid-Induced Insulin Resistance. *International Journal of Molecular Sciences* *2020*, Vol. *21*, Page *9438*, *21*(24), 9438. <https://doi.org/10.3390/IJMS21249438>
- Sequeira, V., & Maack, C. (2018). Rebalancing protein phosphorylation in heart failure to prevent arrhythmias. *European Journal of Heart Failure*, *20*(12), 1686–1689. <https://doi.org/10.1002/EJHF.1315>

- Shah, A., Gandhi, D., Srivastava, S., Shah, K. J., & Mansukhani, R. (2017). Heart Failure: A Class Review of Pharmacotherapy. *Pharmacy and Therapeutics*, *42*(7), 464. [/pmc/articles/PMC5481297/](https://pubmed.ncbi.nlm.nih.gov/3481297/)
- Shah, K. S., Xu, H., Matsouaka, R. A., Bhatt, D. L., Heidenreich, P. A., Hernandez, A. F., Devore, A. D., Yancy, C. W., & Fonarow, G. C. (2017). Heart Failure With Preserved, Borderline, and Reduced Ejection Fraction: 5-Year Outcomes. *Journal of the American College of Cardiology*, *70*(20), 2476–2486. <https://doi.org/10.1016/j.jacc.2017.08.074>
- Simmonds, S. J., Cuijpers, I., Heymans, S., & Jones, E. A. V. (2020). Cellular and Molecular Differences between HFpEF and HFrEF: A Step Ahead in an Improved Pathological Understanding. *Cells*, *9*(1). <https://doi.org/10.3390/CELLS9010242>
- Tilemann, L., Lee, A., Ishikawa, K., Agüero, J., Rapti, K., Santos-Gallego, C., Kohlbrenner, E., Fish, K. M., Kho, C., & Hajjar, R. J. (2013). SUMO-1 Gene Transfer Improves Cardiac Function in a Large-Animal Model of Heart Failure. *Science Translational Medicine*, *5*(211), 211ra159-211ra159. <https://doi.org/10.1126/scitranslmed.3006487>
- Tulloch, L. B., Howie, J., Wypijewski, K. J., Wilson, C. R., Bernard, W. G., Shattock, M. J., & Fuller, W. (2011). The inhibitory effect of phospholemman on the sodium pump requires its palmitoylation. *The Journal of Biological Chemistry*, *286*(41), 36020–36031. <https://doi.org/10.1074/jbc.M111.282145>
- Woodley, K. T., & Collins, M. O. (2019). S-acylated Golga7b stabilises DHHC5 at the plasma membrane to regulate cell adhesion. *EMBO Reports*, *20*(10), e47472. <https://doi.org/10.15252/EMBR.201847472>
- Woodley, K. T., & Collins, M. O. (2021). Regulation and function of the palmitoyl-acyltransferase ZDHHC5. *The FEBS Journal*, *288*(23), 6623–6634. <https://doi.org/10.1111/FEBS.15709>
- Yang, W., di Vizio, D., Kirchner, M., Steen, H., & Freeman, M. R. (2010). Proteome scale characterization of human S-acylated proteins in lipid raft-enriched and non-raft membranes. *Molecular & Cellular Proteomics : MCP*, *9*(1), 54–70. <https://doi.org/10.1074/MCP.M800448-MCP200>
